# Supplementary material
Source: ML conference proceedings conference paper supplement (https://openreview.net/forum?id=SNwk8uqmqs)
Supplement: supplementary_material [file attachment]

# Supplementary Materials

Anonymous Authors

## 1 REVIEW OF SPHERICAL HARMONICS

This part is mainly cited from [3].

**Definition** Spherical harmonics define an orthonormal (to get the proof of this, please refer to [2]) basis over the sphere,  $\mathbf{S}$ , analogous to the Fourier transform over the 1D circle. Using the parameterization:

$$s = (x, y, z) = (\sin\theta\cos\phi, \sin\theta\sin\phi, \cos\theta) \quad (1)$$

the basis functions are defined as

$$Y_l^m(\theta, \phi) = K_l^m e^{im\phi} P_l^{|m|}, l \in \mathbb{N}, m \in (-l, l) \quad (2)$$

where  $P_l^{|m|}$  are the associated Legendre polynomials and  $K_l^m$  are the normalization constants

$$K_l^m = \sqrt{\frac{(2l+1)(l-|m|)!}{4\pi(l+|m|)!}} \quad (3)$$

The above definition forms a complex basis; a real-valued basis is given by the simple transformation:

$$y_l^m = \begin{cases} \sqrt{2}K_l^m \cos(m\phi) P_l^m \cos\theta & m > 0 \\ \sqrt{2}K_l^m \sin(-m\phi) P_l^m \cos\theta & m < 0 \\ \sqrt{2}K_0^0 P_0^0 \cos\theta & m = 0 \end{cases} \quad (4)$$

Low values of  $l$  (called the band index) represent low-frequency basis functions over the sphere. The basis functions for band  $l$  reduce to polynomials of order  $l$  in  $x$ ,  $y$ , and  $z$ . **Projection and**

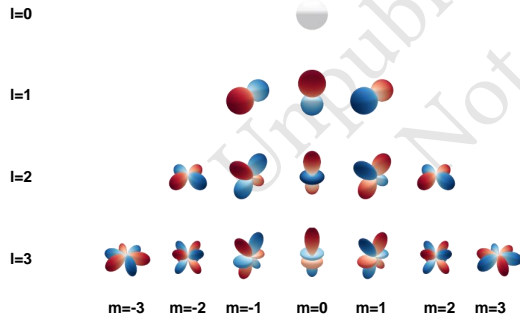

Figure 1: Spherical Harmonics

**Reconstruction** Any function  $F(s)$  defined on the sphere  $S$  can be represented as a set of SH basis functions:

$$F(s) \approx \sum_{l=0}^{n-1} \sum_{m=-l}^l f_l^m Y_l^m(s) = \tilde{F}(s) \quad (5)$$

where  $n$  denotes the degree of SH and  $Y_l^m(s)$  is a set of real basis of SH.  $\tilde{F}(s)$  is the  $n$ -th order reconstruction function which approximates  $f$  increasingly well as the number of bands  $n$  increases.

2024-04-19 06:20. Page 1 of 1-4.

Because the SH basis is orthonormal, the scalar function  $F$  can be projected into its coefficients via the integral:

$$f_l^m = \int F(s) Y_l^m(s) ds \quad (6)$$

Low-frequency signals can be accurately represented with only a few SH bands. It is often convenient to rewrite 7 in terms of a singly indexed vector of projection coefficients and basis functions, via:

$$F(s) \approx \sum_{i=0}^{n^2-1} f_i Y_i(s) = \tilde{F}(s) \quad (7)$$

where  $i = l(l+1) + m + 1$ .

**Basic Properties** A critical property of SH projection is its rotational invariance; that is, given:  $g(s) = F(Q(s))$  where  $Q$  is an arbitrary rotation over  $S$  then:

$$\tilde{g}(s) = \tilde{F}(Q(s)) \quad (8)$$

Orthonormality of the SH basis provides the useful property that given any two functions  $a$  and  $b$  over  $S$ , their projections satisfy:

$$\int a(s)b(s)ds = \sum_{i=0}^{n^2-1} a_i b_i \quad (9)$$

since

$$\int_{\Omega} Y_p(s) Y_q(s) ds = \begin{cases} 1 & \text{if } p = q \\ 0 & \text{otherwise} \end{cases} \quad (10)$$

**Product Projection** Projection of the product of a pair of spherical functions  $c(s) = a(s)b(s)$  where  $a$  is known and  $b$  unknown can be viewed as a linear transformation of the projection coefficients  $b_j$  via a matrix :

$$c(s) = \int a(s)(b_j y_j(s)) y_i(s) ds \quad (11)$$

$$= b_j a_k \int y_j(s) y_i(s) y_k(s) = \tilde{a}_{ij} b_j \quad (12)$$

where summation is implied over the duplicated  $j$  and  $k$  indices. Note that  $\tilde{a}$  is a symmetric matrix.

## 2 DETAILS OF GRADIENT COMPUTATION

In section 4, we claim that our pipeline is differentiable, we will provide the detail proof of and show the gradient computation. From section 4.5 we have:

$$T(\omega_o, \omega_i) = \sum_{i=1}^{m^2} \sum_{j=1}^{n^2} t'_{ij} Y_j(\omega_o) Y_i(\omega_i) \quad (13)$$

where:

$$t'_{ij} = \sum_{l=1}^q \sum_{k=1}^p Y^i(\omega_l^l) T(\omega_l^l, \omega_o^l) Y^j(\omega_o^k) \quad (14)$$

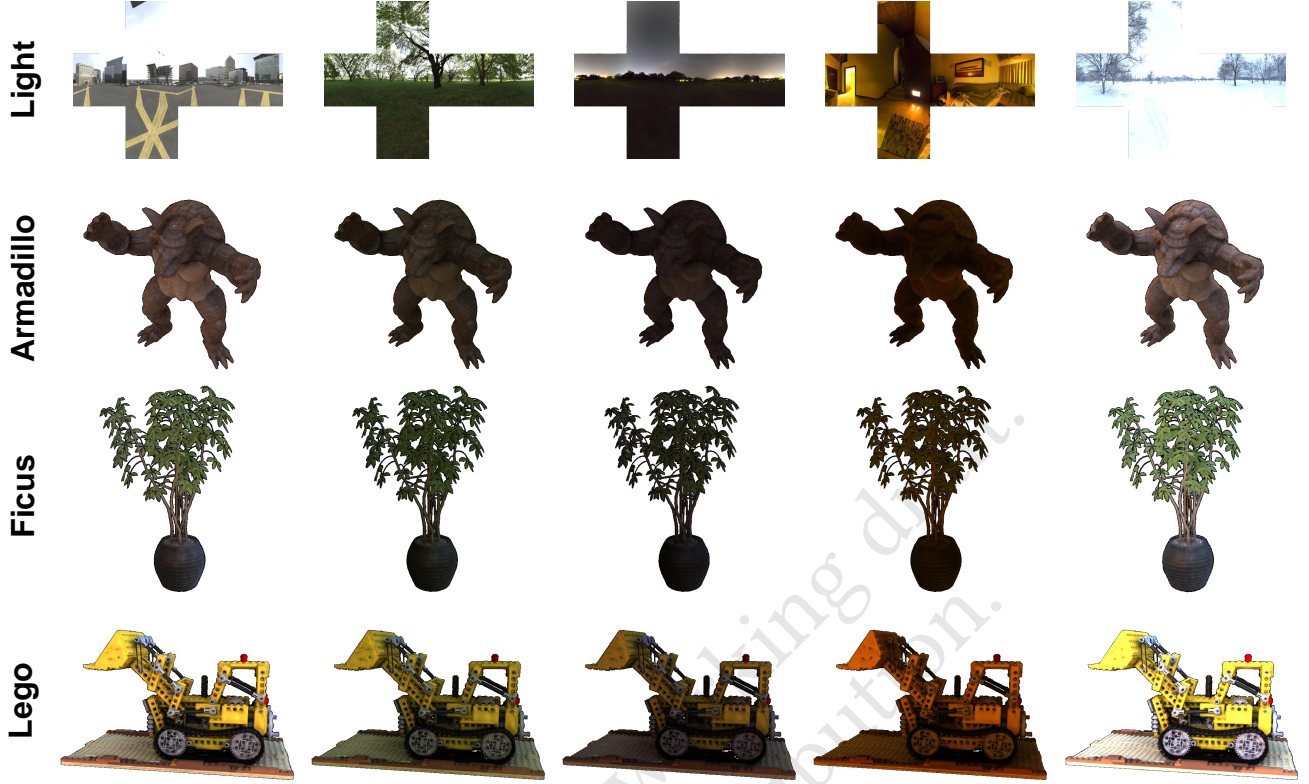

Figure 2: High-quality relighting results achieved by our proposed method on TensorIR dataset

and

$$L_o(x) = \sum_{i=0}^{m^2} \sum_{j=0}^{n^2} l_i t'_{ij} = \tilde{L} \cdot T_{n \times n}^{final} \quad (15)$$

Further, we have:

$$T^{final} = Y_{n \times m}^i T_{m \times m} Y_{m \times n}^j \quad (16)$$

if we use the same sampler for  $Y^i$  and  $Y^j$  we have:

$$Y^i = \text{transpose}(Y^j) \quad (17)$$

Finally, we have:

$$T^{final} = YTY^T \quad (18)$$

where:

$$Y = \begin{pmatrix} y_{11} & y_{12} & \dots & y_{1m} \\ y_{21} & y_{22} & \dots & y_{2m} \\ \vdots & \vdots & \ddots & \vdots \\ y_{n1} & y_{n2} & \dots & y_{nm} \end{pmatrix} \quad (19)$$

and:

$$y_{ij} = Y_i(\omega_j) \quad (20)$$

represent the spherical harmonics basis function result at the direction  $\omega_j$ . We also have:

$$T = \begin{pmatrix} t_{11} & t_{12} & \dots & t_{1m} \\ t_{21} & t_{22} & \dots & t_{2m} \\ \vdots & \vdots & \ddots & \vdots \\ t_{m1} & t_{m2} & \dots & t_{mm} \end{pmatrix} \quad (21)$$

where:

$$t_{ij} = (1 - m) \frac{\rho}{\pi} + \frac{DFG}{4(\omega_i \cdot n)(\omega_j \cdot n)} (\omega_i \cdot n) V(\omega_i, x) d\omega_i \quad (22)$$

We can apply the chain rule to find the derivatives w.r.t.  $\rho$ ,  $D$ ,  $F, G$  and get the derivatives of  $m$  and  $r$  by  $D, F, G$ . To simplify the representation, we use  $\rho$  as an example:

$$\frac{\partial T^{final}}{\partial \rho} = \frac{\partial T^{final}}{\partial T} \frac{\partial T}{\partial \rho} \quad (23)$$

where:

$$\frac{\partial T^{final}}{\partial T} = YY^T \quad (24)$$

and

$$\frac{\partial t_{ij}}{\partial \rho} = \frac{(1 - m)}{\pi} \quad (25)$$

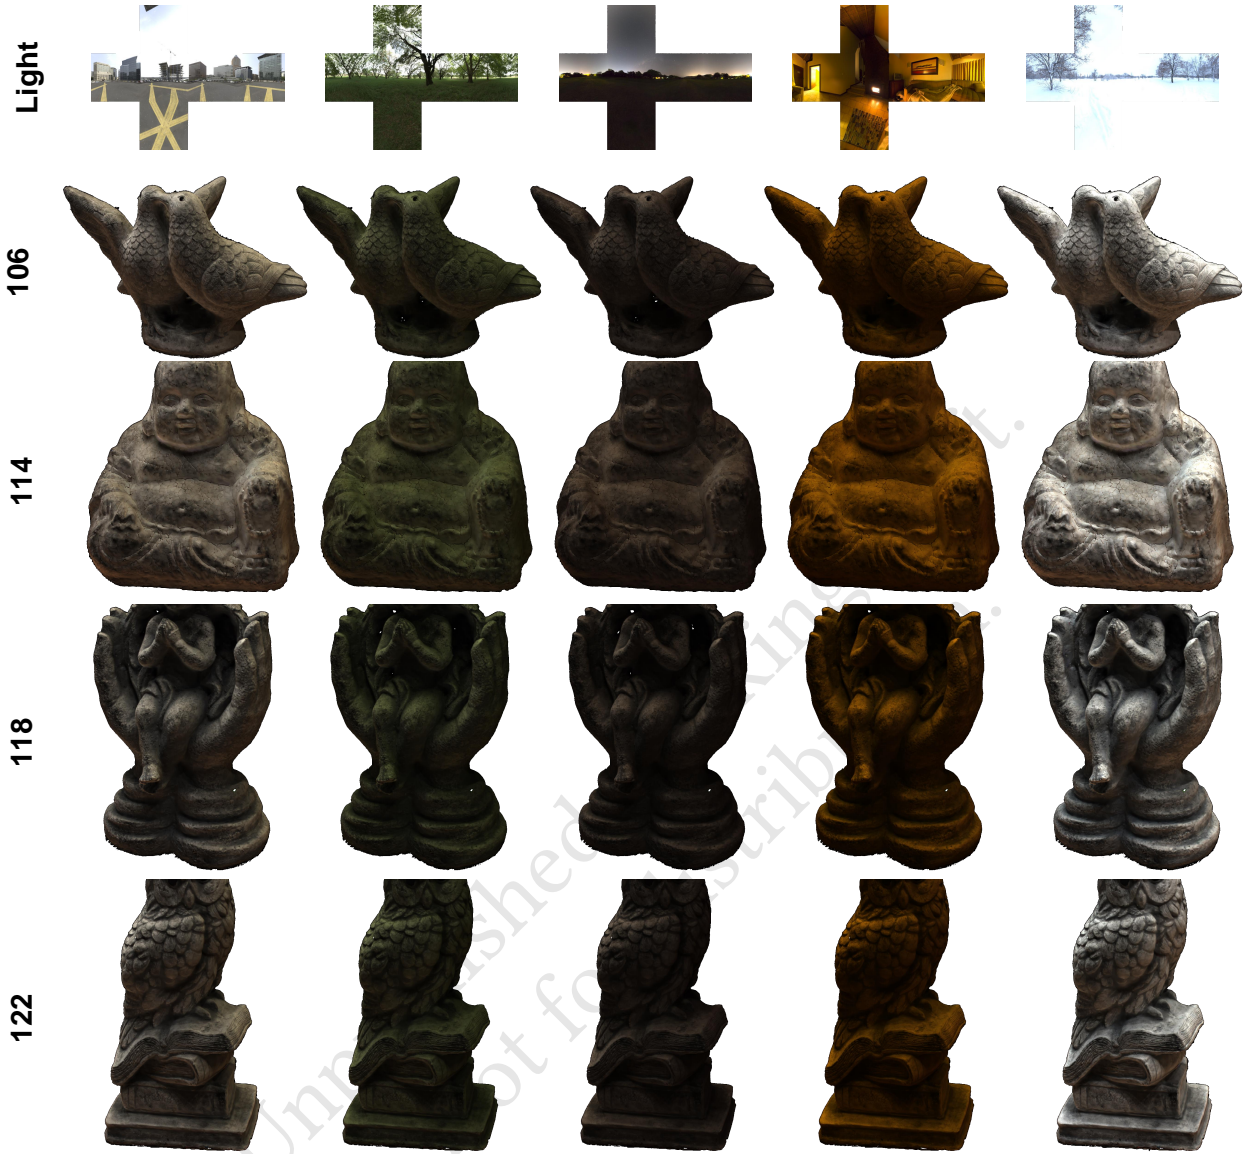

Figure 3: High-quality relighting results achieved by our proposed method on DTU dataset [1].

we have:

$$\frac{\partial \mathbf{T}^{\text{final}}}{\partial \rho} = \begin{pmatrix} t'_{11} & t'_{12} & \cdots & t'_{1m} \\ t'_{21} & t'_{22} & \cdots & t'_{2m} \\ \vdots & \vdots & \ddots & \vdots \\ t'_{m1} & t'_{m2} & \cdots & t'_{mm} \end{pmatrix} \quad (26)$$

and:

$$t'_{ij} = \frac{(1-m)}{\pi} Y_i(\omega_j) Y_j(\omega_i) \quad (27)$$

### 3 RESULTS ON TENSOIR SYNTHETIC DATASET

Tab 1 provides the results on normal estimation, novel view synthesis, and relighting for all scenes. We also visualize the relighting results of PRTGS in Fig 2.

### 4 RESULTS ON REAL-WORLD DATASET

For the real-world Dataset, we list the results on novel view synthesis (i.e.PSNR, SSIM, and LPIPS) of PRTGS and some NeRF variants in Tabs 2, 3 and 4. In addition, we provide the relighting results of all seven publicly available scenes in Fig 3.

**Table 1: TensolR dataset**

| Scene     | Method      | Novel View Synthesis |                 |                    | Relight         |                 |                    |
|-----------|-------------|----------------------|-----------------|--------------------|-----------------|-----------------|--------------------|
|           |             | PSNR $\uparrow$      | SSIM $\uparrow$ | LPIPS $\downarrow$ | PSNR $\uparrow$ | SSIM $\uparrow$ | LPIPS $\downarrow$ |
| Lego      | NeRFactor   | 26.076               | 0.881           | 0.151              | 23.246          | 0.865           | 0.156              |
|           | InvRender   | 24.391               | 0.883           | 0.151              | 20.117          | 0.832           | 0.171              |
|           | NVDiffrec   | 30.056               | 0.945           | 0.059              | 20.088          | 0.844           | 0.114              |
|           | TensolR     | 34.700               | 0.968           | 0.037              | 28.581          | 0.944           | 0.081              |
|           | Gsir        | 34.379               | 0.968           | 0.036              | 23.256          | 0.842           | 0.117              |
|           | Relightable | 36.741               | 0.976           | 0.024              | 21.860          | 0.834           | 0.115              |
|           | Ours        | 37.830               | 0.980           | 0.020              | 24.005          | 0.879           | 0.095              |
| Armadillo | NeRFactor   | 26.479               | 0.947           | 0.095              | 26.887          | 0.944           | 0.102              |
|           | InvRender   | 31.116               | 0.968           | 0.057              | 27.814          | 0.949           | 0.069              |
|           | NVDiffrec   | 33.664               | 0.983           | 0.031              | 23.099          | 0.921           | 0.063              |
|           | TensolR     | 39.050               | 0.986           | 0.039              | 34.504          | 0.975           | 0.045              |
|           | Gsir        | 39.287               | 0.980           | 0.039              | 27.737          | 0.918           | 0.091              |
|           | Ours        | 46.917               | 0.991           | 0.024              | 32.443          | 0.947           | 0.050              |
| Ficus     | NeRFactor   | 21.664               | 0.919           | 0.095              | 20.684          | 0.907           | 0.107              |
|           | InvRender   | 22.131               | 0.934           | 0.057              | 20.330          | 0.895           | 0.073              |
|           | NVDiffrec   | 22.131               | 0.946           | 0.064              | 17.260          | 0.865           | 0.073              |
|           | TensolR     | 29.780               | 0.973           | 0.041              | 24.296          | 0.947           | 0.068              |
|           | Gsir        | 33.551               | 0.976           | 0.031              | 24.932          | 0.893           | 0.081              |
|           | Relightable | 37.830               | 0.989           | 0.013              | 26.584          | 0.896           | 0.081              |
|           | Ours        | 41.207               | 0.994           | 0.012              | 26.721          | 0.888           | 0.076              |

**Table 2: MipNerf360 psnr**

| Method    | bicycle | garden | stump  | room   | counter | kitchen | bonsai |
|-----------|---------|--------|--------|--------|---------|---------|--------|
| NeRF++    | 22.64   | 24.32  | 24.34  | 28.87  | 26.38   | 27.80   | 29.15  |
| Plenoxels | 21.91   | 23.49  | 20.66  | 27.59  | 23.62   | 23.42   | 24.67  |
| INGP-Base | 22.19   | 24.60  | 23.63  | 29.27  | 26.44   | 28.55   | 30.34  |
| INGP-Big  | 22.17   | 25.07  | 23.47  | 29.69  | 26.69   | 29.48   | 30.69  |
| Gsir      | 23.68   | 25.47  | 25.22  | 29.56  | 26.16   | 27.90   | 28.65  |
| Ours      | 25.919  | 31.223 | 30.563 | 24.479 | 26.864  | 27.82   | 29.946 |

**Table 3: MipNerf360 ssim**

| Method    | bicycle | garden | stump | room  | counter | kitchen | bonsai |
|-----------|---------|--------|-------|-------|---------|---------|--------|
| NeRF++    | 0.455   | 0.546  | 0.453 | 0.843 | 0.775   | 0.749   | 0.792  |
| Plenoxels | 0.496   | 0.606  | 0.523 | 0.842 | 0.759   | 0.648   | 0.814  |
| INGP-Base | 0.491   | 0.649  | 0.574 | 0.855 | 0.798   | 0.818   | 0.890  |
| INGP-Big  | 0.512   | 0.701  | 0.594 | 0.871 | 0.817   | 0.858   | 0.906  |
| Gsir      | 0.686   | 0.791  | 0.707 | 0.888 | 0.850   | 0.874   | 0.909  |
| Ours      | 0.763   | 0.934  | 0.942 | 0.744 | 0.843   | 0.907   | 0.921  |

**Table 4: MipNerf360 lpips**

| Method    | bicycle | garden | stump | room  | counter | kitchen | bonsai |
|-----------|---------|--------|-------|-------|---------|---------|--------|
| NeRF++    | 0.455   | 0.331  | 0.416 | 0.335 | 0.351   | 0.260   | 0.291  |
| Plenoxels | 0.506   | 0.386  | 0.503 | 0.419 | 0.441   | 0.447   | 0.398  |
| INGP-Base | 0.487   | 0.312  | 0.450 | 0.301 | 0.342   | 0.254   | 0.227  |
| INGP-Big  | 0.446   | 0.257  | 0.421 | 0.261 | 0.306   | 0.195   | 0.205  |
| Gsir      | 0.296   | 0.181  | 0.294 | 0.244 | 0.243   | 0.118   | 0.231  |
| Ours      | 0.248   | 0.168  | 0.156 | 0.246 | 0.158   | 0.174   | 0.126  |

## REFERENCES

- [1] Rasmus Jensen, Anders Dahl, George Vogiatzis, Engin Tola, and Henrik Aanaes. 2014. Large scale multi-view stereopsis evaluation. In *Proceedings of the IEEE conference on computer vision and pattern recognition*. 406–413.
- [2] Volker Schönefeld. 2005. Spherical harmonics. *Computer Graphics and Multimedia Group, Technical Note. RWTH Aachen University, Germany* 18 (2005).
- [3] Peter-Pike Sloan, Jan Kautz, and John Snyder. 2002. Precomputed Radiance Transfer for Real-Time Rendering in Dynamic, Low-Frequency Lighting Environments. (2002).
